# Supplementary material for: Inhibition of PIKfyve prevents myocardial apoptosis and hypertrophy through activation of SIRT3 in obese mice
Source: PubMed Central journal article supplement (PMC5452048; doi:10.15252/emmm.201607096), 2017-04-10
Supplement: EMMM-9-770-s001.pdf [file EMMM-9-770-s001.pdf]

**Inhibition of PIKfyve prevents myocardial apoptosis and hypertrophy through activation of SIRT3 in obese mice**

Helene Tronchere, Mathieu Cinato, Andrei Timotin, Laurie Guitou, Camille Villedieu, Helene Thibault, Delphine Baetz, Bernard Payrastre, Philippe Valet, Angelo Parini, Oksana Kunduzova and Frederic Boal

**Appendix**

Appendix Table S1

Appendix Table S1

| <b>Figure</b>     | <b>p values</b>                                                                                                                                                                              | <b>n per group</b>              |
|-------------------|----------------------------------------------------------------------------------------------------------------------------------------------------------------------------------------------|---------------------------------|
| <b>1A</b>         | p(H)=0.0022<br>p(H+STA)=0.0238                                                                                                                                                               | n=5;5;4;5                       |
| <b>1B</b>         | p(2DG)=0,000327851<br>p(2DG+STA)=0,000985021                                                                                                                                                 | n=3;3                           |
| <b>1C</b>         | p(H)=1,73497E-10<br>p(H+STA)=1,64667E-07                                                                                                                                                     | n=279;239;246;279               |
| <b>1D</b>         | p(H)=0,001598122<br>p(H+STA)=0,001754578                                                                                                                                                     | n=6;6;3;5                       |
| <b>1E-MitoSOX</b> | p(H)=1,50572E-09<br>p(H+STA)=7,45996E-07                                                                                                                                                     | n=30;25;16;22                   |
| <b>1E-MitoPY1</b> | p(H)=4,17123E-12<br>p(H+STA)=3,0993E-31                                                                                                                                                      | n=26;24;65;81                   |
| <b>1F-MitoSOX</b> | p(2DG)=2,24605E-37<br>p(2DG+STA)=3,23126E-38                                                                                                                                                 | n=154;85;159;142                |
| <b>1F-MitoPY1</b> | p(2DG)=5,66723E-08<br>p(2DG+STA)=3,66877E-19                                                                                                                                                 | n=15;27;62;40                   |
| <b>2A</b>         | p(H)=0,0066<br>p(H+STA)=0,0075                                                                                                                                                               | n=3;3;4;4                       |
| <b>2B</b>         | p(H)=0,037316659<br>p(H+STA)=0,030044802                                                                                                                                                     | n=4;3;3;3                       |
| <b>2C</b>         | p(2DG)=0,0002<br>p(2DG+STA)=0,0079                                                                                                                                                           | n=3;3;4;3                       |
| <b>2D</b>         | p(2DG)=0,0005<br>p(2DG+STA)=0,0070                                                                                                                                                           | n=4;4;4;4                       |
| <b>2E</b>         | p(H)=6,64015E-06<br>p(H+STA)=0,000112656                                                                                                                                                     | n=10;16;15;13                   |
| <b>2F</b>         | p(2DG)=1,89082E-12<br>p(2DG+STA)=4,95436E-06                                                                                                                                                 | n=46;40;51;32                   |
| <b>2G</b>         | p(H)=1,96997E-05<br>p(H+STA)=0,0003<br>p(H+Mdivi-1)=2,2448E-05                                                                                                                               | n=86;33;100;88;43               |
| <b>2H</b>         | p(2DG)=4,39527E-21<br>p(2DG+STA)=6,5583E-05<br>p(2DG+Mdivi-1)=0,00113866                                                                                                                     | n=86;41;107;114;52              |
| <b>3B</b>         | p(N+STA)=1,78309E-07<br>p(H+STA)=3,64902E-12                                                                                                                                                 | n=69;73;91;75                   |
| <b>3D</b>         | p(N+STA)=0,000417432<br>p(H+STA)=0,001611735                                                                                                                                                 | n=3;3;3;3                       |
| <b>4B</b>         | p(siCont+2DG)=1,00999E-11<br>p(siSIRT3+2DG)=2,68762E-15<br>p(siSIRT3+2DG+STA)=8,49542E-17<br>p(siCont+2DG vs siCont+2DG+STA)=9,41507E-08<br>p(siCont+2DG+STA vs siSIRT3+2DG+STA)=3,80429E-11 | n=116;101;157;79;105;133;75;134 |
| <b>4D</b>         | p(siCont+2DG)=5,4264E-06                                                                                                                                                                     | n=6;6;5;7;6;6;4                 |

|           |                                                                                                                                                            |            |
|-----------|------------------------------------------------------------------------------------------------------------------------------------------------------------|------------|
|           | p(siSIRT3+2DG)=6,26395E-07<br>p(siSIRT3+2DG+STA)=1,24641E-05<br>p(siCont+2DG vs siCont+2DG+STA)=8,18192E-05<br>p(siCont+2DG+STA vs siSIRT3+2DG+STA)=0,0005 |            |
| <b>5B</b> | p(ND vs. Vehicle-HFD)=0,00115386<br>p(Vehicle-HFD vs. STA-HFD)=1,57681E-06                                                                                 | n=6;8;5    |
| <b>5C</b> | p(ND vs. Vehicle-HFD)=0,00056281<br>p(Vehicle-HFD vs. STA-HFD)=1,3975E-06                                                                                  | n=6;8;5    |
| <b>5D</b> | p(ND vs. Vehicle-HFD)=8,08843E-05<br>p(Vehicle-HFD vs. STA-HFD)=0,000475435                                                                                | n=6;8;5    |
| <b>5E</b> | p(ND vs. Vehicle-HFD)=2,79186E-06<br>p(Vehicle-HFD vs. STA-HFD)=0,000279659                                                                                | n=6;8;5    |
| <b>5F</b> | p(ND vs. Vehicle-HFD)=0,0232<br>p(Vehicle-HFD vs. STA-HFD)=0,0431                                                                                          | n=5;4;5    |
| <b>5G</b> | p(ND vs. Vehicle-HFD)=8,70066E-12<br>p(Vehicle-HFD vs. STA-HFD)=1,45491E-14                                                                                | n=33;57;32 |
| <b>5H</b> | p(ND vs. Vehicle-HFD)=0,0001<br>p(Vehicle-HFD vs. STA-HFD)=0,0168<br>p(ND vs. STA-HFD)=0,0014                                                              | n=6;4;6    |
| <b>5I</b> | p(ND vs. Vehicle-HFD)=0,0020<br>p(Vehicle-HFD vs. STA-HFD)=0,0473<br>p(ND vs. STA-HFD)=0,0345                                                              | n=6;4;6    |
| <b>5J</b> | p(ND vs. Vehicle-HFD)=0,000510233<br>p(Vehicle-HFD vs. STA-HFD)=0,007018196                                                                                | n=7;5;5    |
| <b>6B</b> | p(ND vs. Vehicle-HFD)=4,42196E-06<br>p(Vehicle-HFD vs. STA-HFD)=5,37517E-06                                                                                | n=4;4;3    |
| <b>6D</b> | p(ND vs. Vehicle-HFD)=<br>0,000415662<br>p(Vehicle-HFD vs. STA-HFD)=2,9604E-05                                                                             | n=4;4;3    |
| <b>6E</b> | p(ND vs. Vehicle-HFD)=0,0068<br>p(Vehicle-HFD vs. STA-HFD)=0,0026<br>p(ND vs. STA-HFD)=0,0399                                                              | n=3;5;6    |
| <b>7B</b> | p(ND vs. Vehicle-HFD)=3,11528E-25<br>p(Vehicle-HFD vs. STA-HFD)=6,80775E-10<br>p(ND vs. STA-HFD)=7,96583E-09                                               | n=4;4;6    |
| <b>7D</b> | p(I, ND vs. Vehicle-HFD)=0,0447<br>p(I, Vehicle-HFD vs. STA-HFD)=0,0026                                                                                    | n=3;5;4    |
|           | p(II, ND vs. Vehicle-HFD)=0,0444<br>p(II, Vehicle-HFD vs. STA-HFD)=0,0204                                                                                  | n= 3;6;3   |
|           | p(III, Vehicle-HFD vs. STA-HFD)=0,0002                                                                                                                     | n=3;6;4    |
|           | p(IV-I, Vehicle-HFD vs. STA-HFD)=0,0085                                                                                                                    | n=4;6;4    |
|           | p(V, ND vs. Vehicle-HFD)=0,0230<br>p(V, Vehicle-HFD vs. STA-HFD)=0,000148371                                                                               | n=4;6;4    |
| <b>8A</b> | p=0,0089                                                                                                                                                   | n=4;3      |
| <b>8B</b> | p=0,0036                                                                                                                                                   | n=4;3      |

|             |                                                                                                        |                           |
|-------------|--------------------------------------------------------------------------------------------------------|---------------------------|
| <b>8C</b>   | p=0,0153                                                                                               | n=4;3                     |
| <b>9B</b>   | p(WT, ISO vs. C)=1,95534E-05<br>p(WT, ISO+STA vs.ISO)=0,004815233<br>p(SIRT3.KO, ISO vs.C)=0,013635739 | n=9;3;4;9;3;4             |
| <b>9C</b>   | p=0,0102                                                                                               | n=3;4;3;4                 |
| <b>9D</b>   | p(Vehicle vs. ISO)=0,0156<br>p(ISO vs. ISO+STA)=0,0232                                                 | n=4;3;4                   |
| <b>EV1B</b> | p=0,0095                                                                                               | n=3;3                     |
| <b>EV1C</b> | p(N vs. H)=0,0005<br>p(H vs. H+STA)=2,33398E-05<br>p(H vs. H+siPIKfyve)=0,000145237                    | n=27;41;54;65;22;42;40;49 |
| <b>EV1D</b> | p(N vs. H)=0,0024<br>p(H vs. H+siPIKfyve)=0,0005                                                       | n=13;18;23;11             |
| <b>EV1E</b> | p(N vs. H)=5,48656E-15<br>p(H vs. H+siPIKfyve)=4,43348E-15                                             | n=44;35;53;48             |
| <b>EV2</b>  | p=1,11323E-06                                                                                          | n=4;4                     |
| <b>EV3A</b> | p=0,0007                                                                                               | n=6;6                     |
| <b>EV3B</b> | p=0,0475                                                                                               | n=5;5                     |
| <b>EV3D</b> | p=0,0471                                                                                               | n=5;5                     |
| <b>EV3E</b> | p=0,0063                                                                                               | n=6;5                     |
